# Supplementary material
Source: PubMed Central journal article supplement (PMC4576061)
Supplement: AAC.01307-15_zac010154386so1.pdf [file AAC.01307-15_zac010154386so1.pdf]

# Supplement

Influence of *yjiL* and upstream genes on the antibacterial activity of proline-rich antimicrobial peptides overcoming *Escherichia coli* resistance induced by the missing SbmA transporter system

Andor Krizsan, Daniel Knappe and Ralf Hoffmann

**Materials used in this study and suppliers:** AppliChem GmbH (Darmstadt, Germany): Tetracycline hydrochloride ( $\geq 95\%$ ), tris(hydroxymethyl)aminomethane (Tris); Biosolve BV (Valkenswaard, Netherlands): dimethylformamide (DMF, peptide synthesis grade), acetonitrile (HPLC-S gradient grade); Bruker Daltonics GmbH (Bremen, Germany): alpha-cyano-4-hydroxycinnamic acid (CHCA); Carl Roth GmbH, Karlsruhe, Germany): Agar-Agar Kobe I, ampicillin sodium salt ( $\geq 99\%$ ), chloramphenicol ( $\geq 98,5\%$ ), potassium chloride ( $\geq 99\%$ ), potassium dihydrogen phosphate ( $\geq 99\%$ ), magnesium chloride ( $\geq 99\%$ ), dithiothreitol ( $\geq 99\%$ ), dichloromethane (DCM), tryptone, yeast extract; Gibco® (Paisley, UK): phosphate buffered saline (PBS, pH 7.4); Greiner Bio-One GmbH (Frickenhausen, Germany): 96- and 384-well microtiter plates; Iris Biotech (Marktredwitz, Germany): leucin-Wang resin; Merck KGaA (Darmstadt, Germany): diethyl ether (puriss); MultiSynTech GmbH: Rink amide 4-methylbenzhydrylamine (MBHA) resin, 4-benzyloxybenzyl alcohol (Wang) resin, 2-(1H-benzotriazol-1-yl)-1,1,3,3-tetramethyluronium hexafluorophosphate (HBTU); Orpegen Pharma GmbH (Heidelberg, Germany) or MultiSynTech GmbH (Witten, Germany) or Iris Biotech: all 9-fluorenylmethoxycarbonyl- (Fmoc-) protected amino acids; Phenomenex Inc. (Torrance, CA, USA): Jupiter C<sub>18</sub>-columns (internal diameter (ID): 21.2 mm, length: 250 mm, particle size: 15  $\mu\text{m}$ , pore size: 30 nm; ID: 10 mm, length: 250 mm, particle size: 5  $\mu\text{m}$ , pore size: 30 nm; ID: 2 mm, length: 150 mm, particle size: 5  $\mu\text{m}$ , pore size: 30 nm); Sigma-Aldrich GmbH (Taufkirchen, Germany): 1,2-ethanedithiole ( $\geq 98\%$ ), m-cresole (99%), thioanisole ( $\geq 99\%$ ), *N,N*-diisopropylcarbodiimide (DIC,  $>98\%$  by GC), *N,N*-diisopropylethylamine (DIPEA), 5(6)-carboxyfluorescein (Cf, for fluorescence); 1-hydroxy-benzotriazole (HOBT,  $>98\%$ ), trifluoroacetic acid (TFA, UV-grade for HPLC), TFA (purum) for peptide synthesis; *N*-methylmorpholine (NMM,  $>95\%$  GC), , paraformaldehyde (95%), triisopropylsilane (TIS), sodium azide ( $\geq 99,5\%$ ), sodium chloride ( $\geq 99,5\%$ ), disodium hydrogen phosphate  $\times 12 \text{H}_2\text{O}$  ( $\geq 99\%$ ), Mueller Hinton broth (MHB), Tryptic Soy broth (TSB); Thermo Scientific GmbH (Schwerte, Germany): Phusion High-Fidelity DNA Polymerase (2U/ $\mu\text{l}$ ), dNTP Mix (2 mmol/L each).

Phage lysate  $\lambda\text{NK1323}$  containing transposon *Tn10 Tet<sup>R</sup>* carrying a tetracycline resistance was obtained from Prof. Dr. Garys Sawers (Universität Halle/Saale).

**Table S1.** Knock-out (KO) and control (K) primer for *yjiL*, *yjiM*, *yjiN* and *mdtM* and primer using for the arbitrary-primed PCR.

| Primer     | Sequence                                                                                    | Source     |
|------------|---------------------------------------------------------------------------------------------|------------|
| yjiL 3' KO | 5'-ATG ACG CCG ACC GTG GAG TGA AAT AAA AAT AAA AAC TCT TGC GAT TGT GTA GGC TGG AGC T-3'     | This study |
| yjiL 5' KO | 5'-CCG TGT CGC GGC CTT TAT TGA GAT GCT GTA AGG AGT GGC ACC ATG GTC CAT ATG AAT ATC CTC C-3' |            |
| yjiL 3' K  | 5'-CCG TGG AGT GAA ATA AAA AT-3'                                                            |            |
| yjiL 5' K  | 5'-GCC TTT ATT GAG ATG CTG TA-3'                                                            |            |
| yjiM 3' KO | 5'-AGA CGG AAT CAA TGC CAA TCG AAT ATG CCA CTG CCA CTC CGC GAT TGT GTA GGC TGG AGC T-3'     |            |
| yjiM 5' KO | 5'-CCT CTT TTC ATT ATC TCC CGT GGT ACG GGG AAG GAA AAT CCC ATG GTC CAT ATG AAT ATC CTC C-3' |            |
| yjiM 3' K  | 5'-AAT GCC AAT CGA ATA TGC CA-3'                                                            |            |
| yjiM 5' K  | 5'-TTA TCT CCC GTG GTA CGG GG -3'                                                           |            |
| yjiN 3' KO | 5'-GAT CTC TCT CGC GGT TAG CCA CTT AGT TTT TCA TGG ATT TGC GAT TGT GTA GGC TGG AGC T-3'     |            |
| yjiN 5' KO | 5'-TTT TTG CGC GAT CCG GCC GTC AGG CTC TAT TCT TAA CGT TCC ATG GTC CAT ATG AAT ATC CTC C-3' |            |
| yjiN 3' K  | 5'-GCG GTT AGC CAC TTA GTT TT-3'                                                            |            |
| yjiN 5' K  | 5'-ATC CGG CCG TCA GGC TCT AT-3'                                                            |            |
| mdtM 3' KO | 5'-AAC GTT AAG AAT AGA GCC TGA CGG CCG GAT CGC GCA AAA AGC GAT TGT GTA GGC TGG AGC T-3'     |            |
| mdtM 5' KO | 5'-TTT TCC CCG TTG GGG TTC TCC GGA CAA GGA GTT GTT TGT TCC ATG GTC CAT ATG AAT ATC CTC C-3' |            |
| mdtM 3' K  | 5'-ATA GAG CCT GAC GGC CGG AT-3'                                                            |            |
| mdtM 5' K  | 5'-TGG GGT TCT CCG GAC AAG GA-3'                                                            |            |
| IS10-R     | 5'CAAGATGTGTATCCACCTTAACTTAATG-3'                                                           | (1)        |
| ARB2       | 5'-GGCCACGCGTCGACTTAGTTAC-3'                                                                |            |
| ARB6       | 5'-GGCCACGCGTCGACTAGTACNNN NNNNNNACGCC-3'                                                   |            |
| Tn10-2R    | 5'-ACCTTTGGTCACCAACGCTTTTCC-3'                                                              |            |



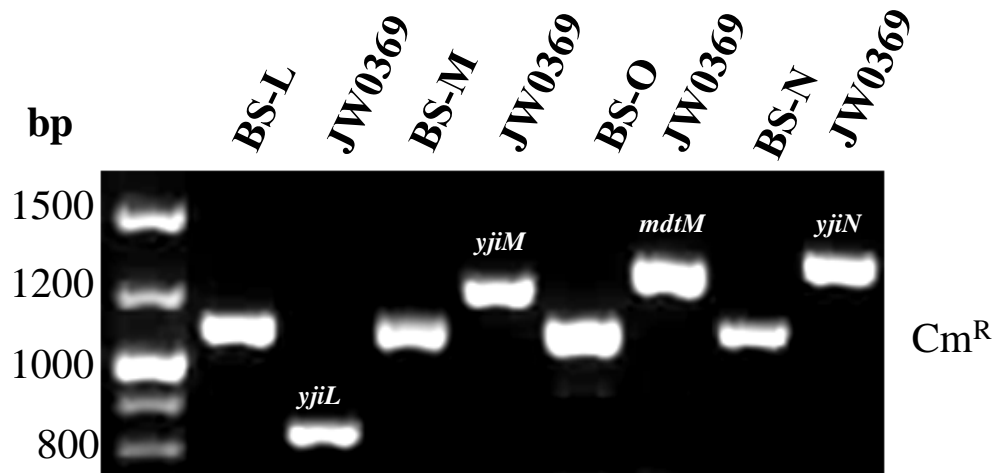

**Figure S1.** Agarose gel of the PCR products after the amplifications of the *yjiL*, *yjiM*, *mdtM*, and *yjiN* genes with the genomic DNA of JW0369, BS-L, BS-M, BS-O, and BS-N using the control primers of each gene. In case of the  $\Delta sbmA$  mutant JW0369, the PCR products showed the expected bands for *yjiL* ( $\approx 768$  bp), *yjiM* ( $\approx 1152$  bp), *mdtM* ( $\approx 1233$  bp), and *yjiN* ( $\approx 1281$  bp). The knock-out mutants BS-L, BS-M, BS-N, and BS-O yielded PCR products of similar sizes of around 1100 bp belonging to the chloramphenicol resistance cassette ( $\text{Cm}^{\text{R}}$ ) of *pkD3*, which confirmed the knock-out of the favored genes *yjiL*, *yjiM*, *mdtM*, and *yjiN*.

```

sbmA          TTCACCATAAAC CAGCTCTTTACGGTAGGCAGCCTCTACACGCTGGTTTTTAAACTCCAG 420
M22          -----

sbmA          CCCCGGCAGTTT GATCCCTACCACTGCCAGCAATCCGGTCCCCATCAGCGACCAGACGAT 480
M22          -----GGGTCGACGATATCATTATAGGGGATTCATCAGCCCATCAGCGACCAGACGAT 52
                                     *****

sbmA          TCGGCAATCACCAGACCATAACGGAATGTGCCCGATAATCGGCAGCTCCGGCACATGCGC 540
M22          TCGGCAATCACCAGACCATAACGGAATGTGCCCGATAATCGGCAGCTCCGGCACATGCGC 112
                                     *****

sbmA          GGAGAGCGTTACCAGCACCGGCAGGAAGGCGATCAACGTCATGATGGCGTTGATAAAACT 600
M22          GGAGAGCGTTACCAGCACCGGCAGGAAGGCGATCAACGTCATGATGGCGTTGATAAAACT 172
                                     *****

sbmA          GACGCCCATATTCTCCAGCGTTGAAGCAAAACGCATGGTGTCTTCTCCTGCACACGCTGTGC 660
M22          GACGCCCATATTCTCCAGCGTTGAAGCAAAACGCATGGTGTCTTCTCCTGCACACGCTGTGC 232
                                     *****

sbmA          GGCCCCTTCGATATGACGCAGTTGTTGCCAGTTCGCCATGTAATATTCGTTTCATCGCTGT 720
M22          GGCCCCTTCGATATGACGCAGTTGTTGCCAGTTCGCCATGTAATATTCGTTTCATCGCTGT 292
                                     *****

```

**Figure S2.** Alignment of the reverse complement sequence of *sbmA* and the sequence of the arbitrary-primed PCR product of the genomic DNA of the MC4100 *Tn10* insertion mutant M22. The remaining sequence of the IS10 element of the *Tn10* transposon next to the IS10-R primer binding site is shown in red, followed by the identified *sbmA* sequence. The *Tn10* transposon was inserted in *sbmA* 761 bp after the start codon, which resulted in the *sbmA* (1-761 bp) – *Tn10* – *sbmA* (761-1221 bp) gene in the genomic DNA of M22. The same result was obtained for the other Api88-resistant MC4100 *Tn10* insertion mutants. The *Tn10* insertion in the *sbmA* gene leads to a truncated, 254 amino acid residues long, and most likely non-functional SbmA protein (full length SbmA contains 406 residues).

**A**

```

yjiL          ACAGTGTGTTGCTGAATCAGAAGCGATCAGCCTGCGCTCAGCGGGCGTCGCGCCAGAAGCG 540
BS2          -----

yjiL          ATTCTCGCAGGAGTGATTAACGCGATGGCGCGGAGGAGTGCCAATTCATTGCTGCTCTC 600
BS2          -----AAATTTTATCATTAGGGGATTCAT 24

yjiL          TCCTGTGAAGCGCCGATTCTGTTTACTGGTGGCGTTAGTCATTGCCAGAAAGTTTGCCCGG 660
BS2          CAGTGTGAAGCGCCGATTCTGTTTACTGGTGGCGTTAGTCATTGCCAGAAAGTTTGCCCGG 84
                *****

yjiL          ATGCTGGAATCTCACCTGCGAATGCCGGTAAATACCCATCCTGATGCGCAATTTGCTGGC 720
BS2          ATGCTGGAATCTCACCTGCGAATGCCGGTAAATACCCATCCTGATGCGCAATTTGCTGGC 144
                *****

yjiL          GCAATTGGCGCGGCGGTAATTGGTCAACGAGTGAGGACACGCCGATGA----- 768
BS2          GCAATTGGCGCGGCGGTAATTGGTCAACGAGTGAGGACACGCCGATGAAAGAGTTTAT 204
                *****

yjiL          -----
BS2          TTTTATTTCACTCCACGGTCGGCGTCCCCCCCCCGTACTAAATCCGCCCGTGGCCCAAT 264

```

**B**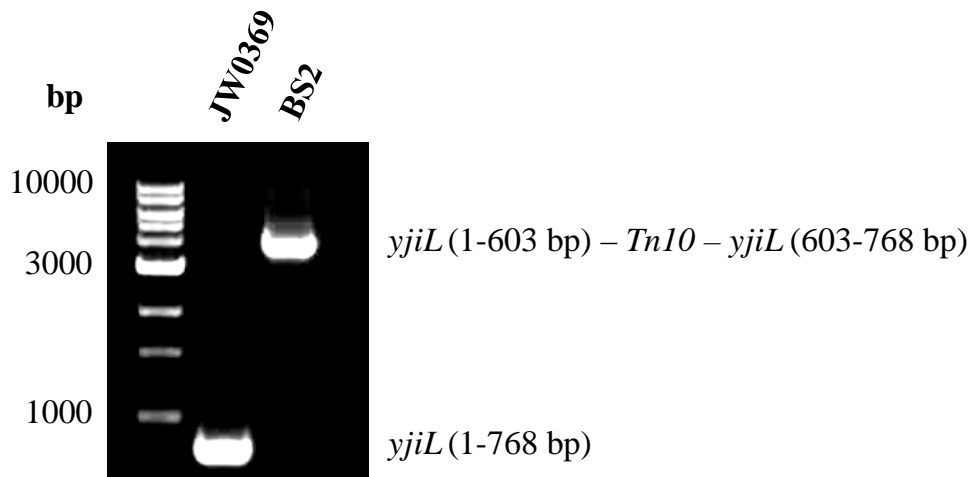

**Figure S3.** (A) Sequence alignment for *yjiL* and the arbitrary-primed PCR product of the genomic DNA of the JW0369 *Tn10* insertion mutant BS2. The remaining sequence of the IS10 element of the *Tn10* transposon next to the IS10-R primer binding site is shown in red, followed by the identified *yjiL* sequence. (B) Agarose gel of the PCR products after amplification of the *yjiL* gene with the genomic DNA of JW0369 and BS2 using the control primers *yjiL3'*K and *yjiL5'*K. The *Tn10* transposon was inserted in *yjiL* 603 bp after the start codon, which resulted in the *yjiL* (1-603 bp) – *Tn10* – *yjiL* (603-768 bp) gene in the genomic DNA of BS2. The same result was obtained for the other Onc112-resistant JW0369 *Tn10* insertion mutants. The *Tn10* insertion in the *yjiL* gene leading to a truncated, 201 amino acid residues long, most likely non-functional *yjiL* protein (predicted protein size is 255 residues).

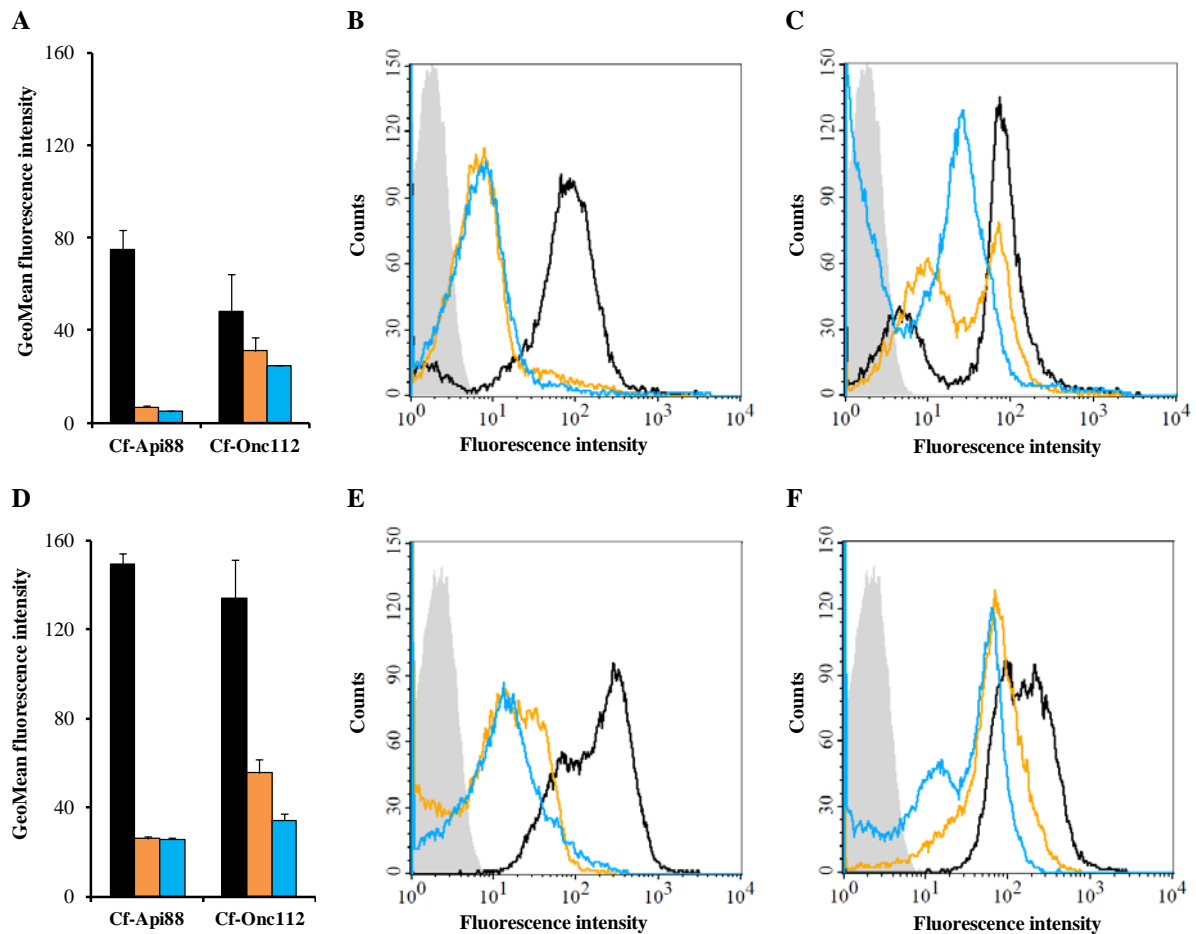

**Figure S4:** Flow cytometry analysis of *E. coli* strains BW25113 (black bars and lines), JW0368 (orange bars and lines), and BS2 (blue bars and lines) incubated with Cf-labelled peptides (6  $\mu$ M) for 30 min (A, B, C) and 90 min (D, E, F) in 33% TSB-medium. GeoMean fluorescence intensities and histogram plots for cells treated with Cf-Api88 (A, B, C, D) and Cf-Onc112 (A, C, D, F). BW25113 treated without peptide as a control is shown as light grey area (B, C, E, F). Uptake studies showed that Cf-Api88 and Cf-Onc112 is transported in lower quantities into the  $\Delta sbmA$  mutant JW0368 and into the  $\Delta sbmA yjiL::Tn10$  mutant BS2 compared to BW25113 at both time points. The uptake of Cf-Onc112 into JW0368 is more efficient than Cf-Api88 after 30 min and 90 min. BS2 showed a similar uptake of Cf-Api88 and a slightly reduced uptake of Cf-Onc112 than JW0368. Shown are the results of two independent experiments.



## References

1. **Fontaine F, Stewart EJ, Lindner AB, Taddei F.** 2008. Mutations in two global regulators lower individual mortality in *Escherichia coli*. *Mol Microbiol* **67**:2–14.
2. **Czihal P, Knappe D, Fritsche S, Zahn M, Berthold N, Piantavigna S, Müller U, Van Dorpe S, Herth N, Binas A, Köhler G, De Spiegeleer B, Martin LL, Nolte O, Sträter N, Alber G, Hoffmann R.** 2012. Api88 is a novel antibacterial designer peptide to treat systemic infections with multidrug-resistant Gram-negative pathogens. *ACS Chem Biol* **7**:1281–91.
3. **Berthold N, Czihal P, Fritsche S, Sauer U, Schiffer G, Knappe D, Alber G, Hoffmann R.** 2013. Novel apidaecin 1b analogs with superior serum stabilities for treatment of infections by gram-negative pathogens. *Antimicrob Agents Chemother* **57**:402–9.
4. **Knappe D, Piantavigna S, Hansen A, Mechler A, Binas A, Nolte O, Martin LL, Hoffmann R.** 2010. Oncocin (VDKPPYLPRPRPPRIYNR-NH 2 ): A Novel Antibacterial Peptide Optimized against Gram-Negative Human Pathogens. *J Med Chem* **53**:5240–5247.
5. **Knappe D, Kabankov N, Hoffmann R.** 2011. Bactericidal oncocin derivatives with superior serum stabilities. *Int J Antimicrob Agents* **37**:166–70.
6. **Scocchi M, Romeo D, Zanetti M.** 1994. Molecular cloning of Bac7, a proline- and arginine-rich antimicrobial peptide from bovine neutrophils. *FEBS Lett* **352**:197–200.
7. **Ostorhazi E, Rozgonyi F, Sztodola A, Harnos F, Kovalszky I, Szabo D, Knappe D, Hoffmann R, Cassone M, Wade JD, Bonomo RA, Otvos L.** 2010. Preclinical advantages of intramuscularly administered peptide A3-APO over existing therapies in *Acinetobacter baumannii* wound infections. *J Antimicrob Chemother* **65**:2416–22.
8. **Bulet P, Dimarcq JL, Hetru C, Lagueux M, Charlet M, Hegy G, Van Dorsselaer A, Hoffmann JA.** 1993. A novel inducible antibacterial peptide of *Drosophila* carries an O-glycosylated substitution. *J Biol Chem* **268**:14893–7.
9. **Cociancich S, Dupont A, Hegy G, Lanot R, Holder F, Hetru C, Hoffmann JA, Bulet P.** 1994. Novel inducible antibacterial peptides from a hemipteran insect, the sap-sucking bug *Pyrrhocoris apterus*. *Biochem J* **300** ( Pt 2):567–75.
10. **Raghuraman H, Chattopadhyay A.** 2007. Melittin: a membrane-active peptide with diverse functions. *Biosci Rep* **27**:189–223.
